# Supplementary material for: CO2abatement using two-dimensional MXene carbides
Source: Royal Society of Chemistry journal article supplement (doi:10.1039/c7ta11379j), 2018-01-01
Supplement: c7ta11379j1.pdf [file c7ta11379j1.pdf]

## CO<sub>2</sub> abatement by two-dimensional MXene carbides

Ángel Morales-García, Adrián Fernández-Fernández, Francesc Viñes\* and Francesc Illas

*Departament de Ciència de Materials i Química Física & Institut de Química Teòrica i Computacional (IQTCUB), Universitat de Barcelona, c/Martí i Franquès 1, 08028 Barcelona, Spain.*

\*E-mail: [francesc.vines@ub.edu](mailto:francesc.vines@ub.edu)

### 1. Computational Aspects: Methods and Models

All calculations have been carried out using the density functional theory (DFT)<sup>1,2</sup> formalism with the generalized gradient approximation (GGA) of Perdew, Burke, and Ernzerhof (PBE),<sup>3</sup> as implemented in the Vienna *ab initio* simulation (VASP) package.<sup>4,5</sup> The D3 dispersion correction proposed by Grimme<sup>6</sup> was also applied on PBE (PBE-D3). Projector augmented wave (PAW) potentials<sup>7</sup> were used to describe the electron-ionic core interaction. Brillouin zone integration was sampled using the Monkhorst and Pack method<sup>8</sup> by 5×5×1 **k**-grid mesh. The valence electron density was expanded in a plane wave basis set with a cut-off energy of 415 eV. The threshold for the electronic optimization was set to 10<sup>-5</sup> eV, and geometry optimizations were considered converged when forces acting on atoms were below 0.01 eV/Å.

Transition metal carbides MXene models were built from the removal of A group layer from the MAX phase, where M represents a transition metal (M = Ti, V, Cr, Zr, Nb, Mo, Hf, Ta and W), X denotes C, and A is an A-group (mostly IIIA and IVA, or groups 13 and 14) elements.<sup>9,10</sup> The modeled MXenes contain three atomic layers forming a M-C-M sandwich, *i.e.* M<sub>2</sub>C structure (see Figure S1) with the (0001) orientation exposed. A (3×3) supercell containing 18 M and 9 C atoms, was used and prior optimized to study the adsorption of CO<sub>2</sub>. All atomic layers and CO<sub>2</sub> were allowed to relax during the CO<sub>2</sub> adsorption processes. A vacuum of 10 Å was inserted to avoid the interaction between the slabs. The CO<sub>2</sub> molecule with an PBE C-O distance of 1.176 Å was placed in several sites with different orientations respect on MXene (0001) direction (see Figure S1). Here, the adsorption energy,  $E_{ads}$ , is defined as,

$$E_{ads} = E_{CO_2/MXene} - (E_{MXene} + E_{CO_2}) + E_{ZPE} \quad (1)$$

where  $E_{CO_2/MXene}$  is the energy of CO<sub>2</sub> adsorbed on the corresponding MXene surface.  $E_{MXene}$  and  $E_{CO_2}$  stand for the energy of the relaxed pristine MXene surface and the energy of an isolated CO<sub>2</sub> molecule,

respectively.  $E_{CO_2}$  was calculated at the  $\Gamma$ -point in a symmetric box of  $10 \times 10 \times 10$  Å dimensions, and  $E_{ZPE}$  corresponds to zero-point energy (ZPE) of  $CO_2$  molecule in the harmonic approximation. Note that ZPE is considered for both gas phase and adsorbed  $CO_2$ . Attending to Eq. (1), the stronger adsorption is associated with the more negative  $E_{ads}$ . Note that the vibrational frequencies were calculated decoupled from surface phonons and including frustrated rotations/translations.

To distinguish the  $CO_2$  adsorption sites on the MXene surface, we use a coordination notation pointing out firstly a digit (n) related with the number of  $CO_2$  atoms (3, 2, or 1) linked on the surface ( $\eta^n-CO_2$ ) depending on the orientation of the adsorbed  $CO_2$  molecule (see side view in Figure S1), followed then by a second digit (m) associated to the atomic environment (5, 3, or 2) occupied by the  $CO_2$  molecule ( $\mu^m$ ), finally followed by a specification of the location of the n-contacting molecule atoms (C, M, or B which correspond to Carbon hollow, Metal hollow, or Bridge positions). For instance, Figure S1a shows a flat orientation of the  $CO_2$  with three atoms connected to the surface ( $\eta^3-CO_2$ ) with an atomic environment of 5 surface Metal atoms ( $\mu^5$ ). Finally, the  $CO_2$  carbon atom is located on C top site of the middle layer ( $C_C$ ) and both oxygens on M top of the bottom layer ( $O_M$ ). Looking at the side sketches in Figure S1, we identify five different sites depending on the features described above.

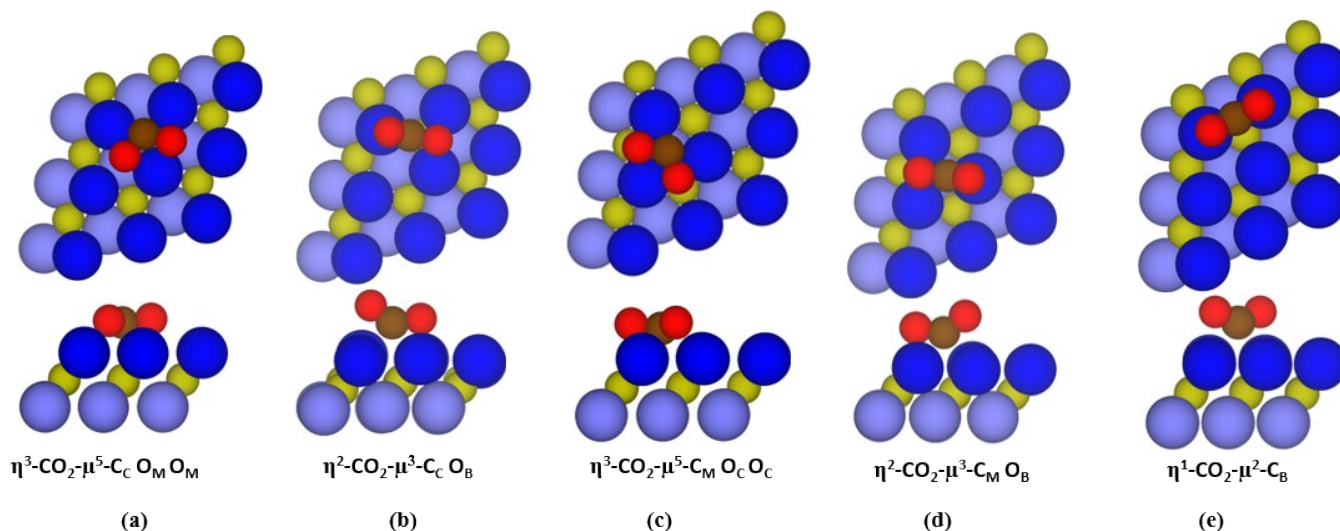

**Figure S1.** Top and side sketches of  $CO_2$  adsorbed on (a)  $\eta^3-CO_2-\mu^5-C_C O_M O_M$ , (b)  $\eta^2-CO_2-\mu^3-C_C O_B$ , (c)  $\eta^3-CO_2-\mu^5-C_M O_C O_C$ , (d)  $\eta^2-CO_2-\mu^3-C_M O_B$ , (e)  $\eta^1-CO_2-\mu^2-C_B$  sites. The  $CO_2$  molecule is depicted with brown and red spheres which correspond to oxygen and carbon atoms, respectively. Layered MXene is described by two dark (top M layer) and light (bottom M layer) blue colors to distinguish the metals of different layers and dark yellow spheres correspond to the carbon middle layer of the MXene material, so to differentiate to the carbon of the  $CO_2$  molecule.

## 2. Interaction of $CO_2$ with MXenes

Table S1 compiles the adsorption energies of CO<sub>2</sub> on MXene surfaces along with the C-O and M-O bond lengths,  $\delta(\text{CO})$  and  $\delta(\text{MO})$ , respectively, the CO<sub>2</sub> molecular angle  $\alpha(\text{OCO})$ , and the Bader charge difference ( $\Delta Q$ ) between the adsorbed and isolated CO<sub>2</sub> molecule. The information is presented itemized per site as shown in Figure S1. Note that calculations show a surface-bound anionic CO<sub>2</sub><sup>δ-</sup> species with bent geometry (see  $\alpha(\text{OCO})$  and  $\Delta Q$  indicators in Table S1). Several studies have evidenced the key role of this activation in further reaction of CO<sub>2</sub>.<sup>11</sup> Previous studies have shown that experimental findings are compatible with the formation of the metastable CO<sub>2</sub><sup>δ-</sup> with a bent geometry.<sup>12</sup> The bent anionic structure has larger C-O distances, 1.31-1.47 Å, than the isolated and neutral molecule, 1.16 Å. Our structural analysis reported in Table S1 indicates the formation of CO<sub>2</sub><sup>δ-</sup> once the molecule is adsorbed, being consistent with the previous studies.<sup>12</sup>

**Table S1.** Adsorption energy (in eV) of CO<sub>2</sub> molecule on MXene carbides at PBE and PBE-D3 levels on the adsorption sites described in Figure S1. Bond lengths  $\delta(\text{CO})$  and  $\delta(\text{MO})$  are given in Å, as well as the CO<sub>2</sub> molecular angle,  $\alpha(\text{OCO})$ , in degrees. The Bader charge analysis,  $\Delta Q$ , are given in *e* and corresponds to charge difference between the adsorbed and isolated CO<sub>2</sub> molecule.

| MXene                                                                                 | Level  | $E_{\text{ads}}^a$ | $\delta(\text{MO})$        | $\delta(\text{CO})$ | $\alpha(\text{OCO})$ | $\Delta Q$ |
|---------------------------------------------------------------------------------------|--------|--------------------|----------------------------|---------------------|----------------------|------------|
| $\eta^3\text{-CO}_2\text{-}\mu^5\text{-C}_\text{C}\text{O}_\text{M}\text{O}_\text{M}$ |        |                    |                            |                     |                      |            |
| Ti <sub>2</sub> C                                                                     | PBE    | -3.36              | 2.15 ; 2.21                | 1.38 (×2)           | 115.1                | -1.85      |
|                                                                                       | PBE-D3 | -3.69              | 2.15 ; 2.21                | 1.39 (×2)           | 115.1                | -1.85      |
| V <sub>2</sub> C                                                                      | PBE    | -1.71              | 2.07 ; 2.31<br>2.20 ; 2.21 | 1.47<br>1.33        | 113.5                | -1.68      |
|                                                                                       | PBE-D3 | -2.41              | 2.08 ; 2.30<br>2.19 ; 2.20 | 1.47<br>1.33        | 113.6                | -1.69      |
| Zr <sub>2</sub> C                                                                     | PBE    | -3.05              | 2.05 (×2)                  | 1.34 (×2)           | 115.3                | -1.32      |
|                                                                                       | PBE-D3 | -3.16              | 2.05 (×2)                  | 1.34 (×2)           | 115.3                | -1.32      |
| Nb <sub>2</sub> C                                                                     | PBE    | -1.62              | 2.37 ; 2.44<br>2.21 ; 2.26 | 1.31<br>1.48        | 113.4                | -1.63      |
|                                                                                       | PBE-D3 | -2.03              | 2.37 ; 2.44<br>2.21 ; 2.25 | 1.31<br>1.50        | 113.2                | -1.64      |
| Hf <sub>2</sub> C                                                                     | PBE    | -3.08              | 2.27 ; 2.31<br>2.26 ; 2.31 | 1.37<br>1.39        | 115.0                | -2.50      |
|                                                                                       | PBE-D3 | -3.36              | 2.27 ; 2.31<br>2.25 ; 2.31 | 1.37<br>1.40        | 115.0                | -2.51      |
| W <sub>2</sub> C                                                                      | PBE    | -0.83              | 2.05 (×2)                  | 1.34 (×2)           | 115.3                | -1.33      |
|                                                                                       | PBE-D3 | -1.31              | 2.05 (×2)                  | 1.34 (×2)           | 115.3                | -1.33      |
| $\eta^3\text{-CO}_2\text{-}\mu^5\text{-C}_\text{M}\text{O}_\text{C}\text{O}_\text{C}$ |        |                    |                            |                     |                      |            |
| Ti <sub>2</sub> C                                                                     | PBE    | -3.15              | 2.18 ; 2.23                | 1.38 (×2)           | 115.8                | -1.87      |
|                                                                                       | PBE-D3 | -3.47              | 2.17 ; 2.23                | 1.39 (×2)           | 115.7                | -1.89      |
| V <sub>2</sub> C                                                                      | PBE    | -1.67              | 2.23 ; 2.27<br>2.08 ; 2.10 | 1.47<br>1.31        | 114.1                | -1.64      |
|                                                                                       | PBE-D3 | -2.36              | 2.23 ; 2.26<br>2.08 ; 2.10 | 1.48<br>1.31        | 114.0                | -1.63      |
| Zr <sub>2</sub> C                                                                     | PBE    | -2.92              | 2.35 ; 2.36<br>2.36 ; 2.37 | 1.37<br>1.36        | 116.3                | -1.78      |
|                                                                                       | PBE-D3 | -3.03              | 2.35 ; 2.36                | 1.37<br>1.36        | 116.3                | -1.78      |
| Nb <sub>2</sub> C                                                                     | PBE    | -1.61              | 2.33 ; 2.39                | 1.35                | 117.5                | -1.59      |

|                                                                              |         |       |             |           |       |       |
|------------------------------------------------------------------------------|---------|-------|-------------|-----------|-------|-------|
|                                                                              |         |       | 2.32 ; 2.42 | 1.34      |       |       |
|                                                                              | PBE-D3  | -2.01 | 2.33 ; 2.39 | 1.35      | 117.5 | -1.59 |
|                                                                              |         |       | 2.32 ; 2.42 | 1.34      |       |       |
| Hf <sub>2</sub> C                                                            | PBE     | -3.05 | 2.30 ; 2.31 | 1.39      | 115.2 | -2.85 |
|                                                                              |         |       | 2.31 ; 2.32 | 1.37      |       |       |
|                                                                              | PBE-D3  | -3.33 | 2.29 ; 2.31 | 1.39      | 115.2 | -2.86 |
|                                                                              |         |       | 2.31 (×2)   | 1.37      |       |       |
| Ta <sub>2</sub> C                                                            | PBE     | -1.97 | 1.36 (×2)   | 1.36 (×2) | 113.8 | -1.69 |
|                                                                              |         |       | 2.02 (×2)   |           |       |       |
|                                                                              | PBE-D3  | -2.37 | 1.36 (×2)   | 1.36 (×2) | 113.8 | -1.69 |
|                                                                              |         |       | 2.02 (×2)   |           |       |       |
| <b>η<sup>1</sup>-CO<sub>2</sub>-μ<sup>2</sup>-C<sub>B</sub></b>              |         |       |             |           |       |       |
| V <sub>2</sub> C                                                             | PBE     | -1.38 | 2.11 (×2)   | 1.28 (×2) | 132.7 | -1.16 |
|                                                                              | PBE-D3  | -2.05 | 2.10 (×2)   | 1.28 (×2) | 132.7 | -1.16 |
| Nb <sub>2</sub> C                                                            | PBE     | -1.60 | 2.25 (×2)   | 1.28 (×2) | 131.2 | -1.19 |
|                                                                              | PBE-D3  | -1.99 | 2.25 (×2)   | 1.28 (×2) | 131.1 | -1.19 |
| Mo <sub>2</sub> C                                                            | PBE     | -1.32 | 2.23 (×2)   | 1.26 (×2) | 134.3 | -0.88 |
|                                                                              | PBE-D3  | -1.61 | 2.23 (×2)   | 1.26 (×2) | 134.4 | -0.89 |
| Ta <sub>2</sub> C                                                            | PBE     | -1.48 | 2.21 (×2)   | 1.28 (×2) | 131.9 | -1.23 |
|                                                                              | PBE-D3  | -1.87 | 2.21 (×2)   | 1.28 (×2) | 131.9 | -1.23 |
| W <sub>2</sub> C                                                             | PBE     | -0.66 | 2.24 (×2)   | 1.26 (×2) | 135.1 | -0.90 |
|                                                                              | PBE-D3  | -1.13 | 2.24 (×2)   | 1.26 (×2) | 135.1 | -0.90 |
| <b>η<sup>2</sup>-CO<sub>2</sub>-μ<sup>3</sup>-C<sub>M</sub>O<sub>B</sub></b> |         |       |             |           |       |       |
| V <sub>2</sub> C                                                             | PBE     | -1.62 | 2.11 ; 2.23 | 1.42      | 125.7 | -1.53 |
|                                                                              |         |       | 2.23        | 1.27      |       |       |
|                                                                              | PBE-D3  | -2.32 | 2.10 ; 2.22 | 1.44      | 125.1 | -1.57 |
|                                                                              |         |       | 2.24        | 1.27      |       |       |
| Nb <sub>2</sub> C                                                            | PBE     | -1.75 | 2.38 (×2)   | 1.33      | 130.2 | -1.41 |
|                                                                              |         |       | 2.37        | 1.27      |       |       |
|                                                                              | PBE-D3  | -2.11 | 2.37 (×2)   | 1.33      | 130.3 | -1.42 |
|                                                                              |         |       | 2.36        | 1.27      |       |       |
| Mo <sub>2</sub> C                                                            | PBE     | -1.33 | 2.34 (×2)   | 1.32      | 132.7 | -1.16 |
|                                                                              |         |       | 2.39        | 1.26      |       |       |
|                                                                              | PBE-D3  | -1.63 | 2.33 (×2)   | 1.32      | 132.8 | -1.16 |
|                                                                              |         |       | 2.38        | 1.26      |       |       |
| Ta <sub>2</sub> C                                                            | PBE     | -1.51 | 2.34 ; 2.35 | 1.34      | 130.6 | -1.51 |
|                                                                              |         |       | 2.36        | 1.27      |       |       |
|                                                                              | PBE-D3* | -2.37 | 1.36 (×2)   | 1.36 (×2) | 113.8 | -1.68 |
|                                                                              |         |       | 2.02 (×2)   |           |       |       |
| <b>η<sup>2</sup>-CO<sub>2</sub>-μ<sup>3</sup>-C<sub>C</sub>O<sub>B</sub></b> |         |       |             |           |       |       |
| Ti <sub>2</sub> C                                                            | PBE     | -2.57 | 2.25        | 1.28      | 131.6 | -1.68 |
|                                                                              |         |       | 2.20 (×2)   | 1.38      |       |       |
|                                                                              | PBE+D3  | -2.88 | 2.25        | 1.28      | 131.7 | -1.71 |
|                                                                              |         |       | 2.20 (×2)   | 1.38      |       |       |
| Mo <sub>2</sub> C                                                            | PBE     | -1.17 | 2.35        | 1.26      | 133.2 | -1.10 |
|                                                                              |         |       | 2.34 (×2)   | 1.31      |       |       |
|                                                                              | PBE+D3  | -1.47 | 2.34        | 1.26      | 133.4 | -1.12 |
|                                                                              |         |       | 2.33 (×2)   | 1.31      |       |       |

<sup>a</sup> ZPE corrected as stated above.

\* After optimization at PBE-D3 level, the CO<sub>2</sub> molecule is found to be stable in η<sup>3</sup>-CO<sub>2</sub>-μ<sup>5</sup>-C<sub>M</sub>O<sub>C</sub>O<sub>C</sub> instead of η<sup>2</sup>-CO<sub>2</sub>-μ<sup>3</sup>-C<sub>M</sub>O<sub>B</sub> as it found at PBE level.

### 3. Model of adsorption/desorption rates

The equation for an elementary reaction rate  $r_i$  is obtained from the Transition State Theory (TST)<sup>13</sup> by

$$r_i = v \cdot \exp\left(-\frac{\Delta E}{k_B \cdot T}\right); v = \frac{k_B \cdot T^\ddagger}{h \cdot q_0} \quad (2)$$

where  $k_B T$  is the product of Boltzmann constant,  $k_B$ , and the temperature,  $T$ , and  $\Delta E$  would be associated to the energy barrier for the described transition. In Eq. (2),  $\nu$  is a pre-factor term obtained from TST with  $h$ ,  $q^\ddagger$  and  $q_0$  being the Planck constant, partition functions of the transitions and initial states, respectively.

The rate of adsorption,  $r_{ads}$ , depends on the influence of adsorbates on the surface. For a non-activated adsorption, it can be calculated  $r_{ads}$  from Eq. (2) by adding the ratio of partition functions for a molecule in gas phase and in an early 2D transition state,<sup>14,15</sup>

$$r_{ads} = \frac{S_0 \cdot p_{CO_2} \cdot A}{\sqrt{2\pi \cdot m \cdot k_B \cdot T}} \quad (3)$$

where  $S_0$  is the initial sticking coefficient,  $p_{CO_2}$  is the  $CO_2$  partial pressure above the surface,  $A$  stands for the area of an adsorption site and  $m$  corresponds to the mass of the  $CO_2$  molecule. A conservative value  $S_0 = 0.40$  was selected for our study following a previous analysis where the  $CO_2$  capture, storage and activation were investigated on transition metal carbides (TMC).<sup>14</sup> Equal adsorption probabilities of all sites (Figure S1) were assumed and therefore,  $A$  was calculated by dividing the supercell area of each surface by the total number of sites in it.<sup>14</sup> Adsorption rates have been calculated for *i*) the current atmospheric partial pressure of  $CO_2$ ,  $p_{CO_2} = 40$  Pa,<sup>16</sup> *ii*) for a partial pressure of  $p_{CO_2} = 0.15$  bar ( $1.5 \cdot 10^3$  Pa), a benchmark value for post-combustion exhaust gases,<sup>17</sup> and *iii*)  $p_{CO_2} = 1.0$  bar ( $10^5$  Pa), a partial pressure regime of interest for pure  $CO_2$  stream generation from a carbon capture and storage (CCS) system.<sup>18</sup>

The rate of desorption,  $r_{des}$ , has been also obtained from eq. (2) using the  $E_{ads}$  values. Note that  $E_{ads}$  is negative by definition and ZPE corrected,

$$r_{des} = v_{des} \cdot \exp\left(\frac{E_{ads}}{k_B \cdot T}\right); v_{des} = \frac{k_B \cdot T \cdot q_{trans,2D}^{gas} \cdot q_{rot}^{gas} \cdot q_{vib}^{gas}}{q_{vib}^{ads}} \quad (4)$$

where the pre-factor for  $v_{des}$  contains the partition function of the molecule in an early 2D transition state in the numerator. This partition function is given by the product  $q_{trans,2D}^{gas} \cdot q_{rot}^{gas} \cdot q_{vib}^{gas}$  in which  $q_{trans,2D}^{gas}$  stands for the partition function for translational motion in two dimensions whereas,  $q_{rot}^{gas}$  and  $q_{vib}^{gas}$  the rotational and vibrational partition functions in the gas phase. Once the molecule is adsorbed on the surface all degrees of freedom are considered as vibrations since molecular translations and rotations become frustrated by the substrate, and so, effectively converted into vibrations. The partition function

$q_{vib}^{gas}$  only contains vibrational contributions. It must be noted that the electronic partition function was set to 1 given the excited electronic states lie high in energy. The partition functions were evaluated as

$$q_{trans,2D}^{gas} = A \cdot \frac{2\pi \cdot k_B \cdot T}{h^2} \quad (5)$$

$$q_{vib}^{ads/gas} = \prod_i \frac{\exp\left(-\frac{h \cdot \nu_i}{2 \cdot k_B \cdot T}\right)}{1 - \exp\left(-\frac{h \cdot \nu_i}{k_B \cdot T}\right)} \quad (6)$$

$$q_{rot}^{gas} = \frac{T}{2 \cdot T_{rot}} \quad (7)$$

where  $\nu_i$  is the vibrational frequency of each normal mode as obtained from our DFT calculations, either for CO<sub>2</sub> molecule in vacuum or adsorbed.  $2 \cdot T_{rot}$  is the product of the rotational temperature for CO<sub>2</sub> and its symmetry number, 2.  $T_{rot}$  is taken as 0.561 K from the literature.<sup>19</sup>

This adsorption/desorption rate model allows one to calculate the rates for desorption and adsorption of CO<sub>2</sub> on MXene (0001) surfaces. Table S2 shows the desorption temperature range for each one of the adsorption sites studied (see Figure S1). The reported temperature range is interpreted as the range in which MXene surface loses its capacity to initially capture and accumulate CO<sub>2</sub> when annealing.

**Table S2.** Desorption temperature range ([PBE]–[PBE-D3]) for CO<sub>2</sub> partial pressure ranges for CO<sub>2</sub> partial pressures of 40, 15·10<sup>3</sup>, and 10<sup>5</sup> Pa, which stand for air, exhaust and desorption, respectively. All temperature values are in K.

| MXene                                                            | Temp. range |           |            |
|------------------------------------------------------------------|-------------|-----------|------------|
|                                                                  | air         | exhaust   | desorption |
| $\eta^3\text{-CO}_2\text{-}\mu^5\text{-C}_C\text{O}_M\text{O}_M$ |             |           |            |
| Ti <sub>2</sub> C                                                | 1456-1598   | 1897-2084 | 2101-2312  |
| V <sub>2</sub> C                                                 | 731-1034    | 938-1340  | 1034-1477  |
| Zr <sub>2</sub> C                                                | 1302-1351   | 1690-1754 | 1869-1938  |
| Nb <sub>2</sub> C                                                | 715-888     | 928-1154  | 1024-1280  |
| Hf <sub>2</sub> C                                                | 1309-1432   | 1695-1855 | 1874-2054  |
| W <sub>2</sub> C                                                 | 344-535     | 426-665   | 461-731    |
| $\eta^3\text{-CO}_2\text{-}\mu^5\text{-C}_M\text{O}_C\text{O}_C$ |             |           |            |
| Ti <sub>2</sub> C                                                | 1365-1511   | 1779-1976 | 1974-2194  |
| V <sub>2</sub> C                                                 | 713-1017    | 918-1317  | 1009-1456  |
| Zr <sub>2</sub> C                                                | 1235-1281   | 1598-1659 | 1765-1831  |
| Nb <sub>2</sub> C                                                | 699-856     | 900-1103  | 997-1218   |
| Hf <sub>2</sub> C                                                | 1279-1397   | 1648-1804 | 1819-1991  |
| Ta <sub>2</sub> C                                                | 799-948     | 1014-1202 | 1112-1315  |

|                                                                          |           |           |           |
|--------------------------------------------------------------------------|-----------|-----------|-----------|
| <b><math>\eta^1\text{-CO}_2\text{-}\mu^2\text{-C}_B</math></b>           |           |           |           |
| V <sub>2</sub> C                                                         | 601-903   | 782-1178  | 866-1310  |
| Nb <sub>2</sub> C                                                        | 712-874   | 930-1141  | 1037-1267 |
| Mo <sub>2</sub> C                                                        | 561-677   | 721-869   | 793-957   |
| Ta <sub>2</sub> C                                                        | 630-787   | 812-1013  | 896-1116  |
| W <sub>2</sub> C                                                         | 470-696   | 600-896   | 657-992   |
| <b><math>\eta^2\text{-CO}_2\text{-}\mu^3\text{-C}_M\text{O}_B</math></b> |           |           |           |
| V <sub>2</sub> C                                                         | 729-1046  | 949-1383  | 1052-1547 |
| Nb <sub>2</sub> C                                                        | 781-888   | 1023-1155 | 1135-1279 |
| Mo <sub>2</sub> C                                                        | 576-696   | 740-898   | 819-990   |
| Ta <sub>2</sub> C                                                        | 688-946   | 904-1200  | 1007-1315 |
| <b><math>\eta^2\text{-CO}_2\text{-}\mu^3\text{-C}_C\text{O}_B</math></b> |           |           |           |
| Ti <sub>2</sub> C                                                        | 1085-1210 | 1384-1543 | 1517-1694 |
| Mo <sub>2</sub> C                                                        | 499-618   | 640-790   | 705-870   |

#### 4. Quantitative adsorption of CO<sub>2</sub> by MXenes

The effectiveness of MXene materials is also investigated to quantify the amount of CO<sub>2</sub> adsorbed per MXene amount as mol CO<sub>2</sub>/kg. of substrate (or mmol CO<sub>2</sub>/g. of substrate). For this purpose we assumed that four CO<sub>2</sub> molecules could be simultaneously adsorbed on each one of the MXene layers within the employed (3×3) supercell, giving a total of 8 CO<sub>2</sub> molecules (upper and bottom layers covered by CO<sub>2</sub>). Table S3 encompasses the estimated CO<sub>2</sub> uptake for MXene surfaces along with experimental evidences of zeolites, metal-organic-frameworks (MOFs), active carbons, and graphene and derivatives.<sup>20</sup>

**Table S3.** Comparison of CO<sub>2</sub> adsorption capacity of MXene with other solid adsorbents: zeolites, MOFs, MgO nanopowders,<sup>21</sup> graphene & derivatives (further details in Ref. 20 and references therein).

| Material          | CO <sub>2</sub> uptake           |                                    |
|-------------------|----------------------------------|------------------------------------|
|                   | g. CO <sub>2</sub> /g. substrate | mol CO <sub>2</sub> /kg. substrate |
| <b>MXene</b>      |                                  |                                    |
| Ti <sub>2</sub> C | 0.36                             | 8.25                               |
| V <sub>2</sub> C  | 0.34                             | 7.80                               |
| Zr <sub>2</sub> C | 0.20                             | 4.57                               |
| Nb <sub>2</sub> C | 0.20                             | 4.49                               |
| Mo <sub>2</sub> C | 0.19                             | 4.36                               |
| Hf <sub>2</sub> C | 0.11                             | 2.41                               |
| Ta <sub>2</sub> C | 0.10                             | 2.37                               |
| W <sub>2</sub> C  | 0.10                             | 2.34                               |
| <b>Zeolites</b>   |                                  |                                    |

|                                   |   |      |
|-----------------------------------|---|------|
| Ca-X                              | — | 3.36 |
| I3X                               | — | 3.96 |
| <b>MOFs</b>                       |   |      |
| Cu-BTTri-mmen                     | — | 2.38 |
| <b>MgO</b>                        |   |      |
| <b>nanopowders</b>                |   |      |
| <b>Graphene &amp; derivatives</b> |   |      |
| a-RGO-750                         | — | 2.18 |
| a-RGO-850                         | — | 2.75 |
| a-RGO-950                         | — | 3.36 |

## REFERENCES

- (1) P. Hohenberg and W. Kohn, *Phys. Rev.*, 1964, **136**, B864.
- (2) W. Kohn and L. J. Sham, *Phys. Rev.*, 1965, **140**, A1133.
- (3) J. P. Perdew, K. Burke and M. Ernzerhof, *Phys. Rev. Lett.*, 1996, **77**, 3865.
- (4) G. Kresse and J. Furthmuller, *Comput. Mater. Sci.*, 1996, **6**, 15-50.
- (5) G. Kresse and J. Furthmuller, *Phys. Rev. B*, 1996, **54**, 11169.
- (6) S. Grimme, J. Anthony, S. Ehrlich and H. Krieg, *J. Chem. Phys.*, 2010, **132**, 154104.
- (7) P. E. Blochl, *Phys. Rev. B*, 1994, **50**, 17953.
- (8) H. J. Monkhorst and J. D. Pack, *Phys. Rev. B*, 1976, **13**, 5188.
- (9) M. Naguib, V. N. Mochalin, M. W. Barsoum and Y. Gogotsi, *Adv. Mater.*, 2014, **26**, 992.
- (10) M. Naguib and Y. Gogotsi, *Acc. Chem. Res.*, 2015, **48**, 128.
- (11) H. J. Freud and M. W. Roberts, *Surf. Sci. Rep.*, 1996, **25**, 225.
- (12) D. Schröder, C. A. Schalley, J. N. Harvey and H. Schwarz, *Int. J. Mass Spectrom.*, 1999, **185**, 25.
- (13) K. Reuter, in *Modeling and Simulation of Heterogeneous Catalytic Reactions*, Wiley-VCH Verlag GmbH & Co. KGaA, 2011, ch. 3.
- (14) S. Pogodin and N. López, *ACS Catal.*, 2014, **4**, 2328.
- (15) C. Kunkel, F. Viñes and F. Illas, *Energy Environ. Sci.*, 2016, **9**, 141.
- (16) T. Takahashi, S. Sutherland and A. Kozyr, *Global Ocean Surface Water Partial Pressure of CO<sub>2</sub> Database: Measurements Performed During 1957–2014 (Version 2014)*. Environmental Sciences Division, Oak Ridge National Laboratory, 2015.
- (17) D. M. D'Alessandro, B. Smit and J. R. Long, *Angew. Chem. Int. Ed.*, 2010, **49**, 6058.



- (18) M. E. Boot-Handford, J. C. Abanades, E. J. Anthony *et al.*, *Energy Environ. Sci.*, 2014, **7**, 130.
- (19) P. W. Atkins and J. de Paula, *Atkins' Physical Chemistry*, Oxford University Press, 8<sup>th</sup> edn., 2006.
- (20) S. Chowdhury and R. Balasubramanian, *Ind. Eng. Chem. Res.*, 2016, **55**, 7906-7916.
- (21) W. Gao, T. Zhou, B. Louis, Q. Wang, *Catalysts* 2017, **7**, 116.
